# Supplementary material for: Intention to receive a COVID-19 vaccine by HIV status among a population-based sample of women and gender diverse individuals in British Columbia, Canada
Source: bioRxiv or medRxiv preprint supplement (doi:10.1101/2021.08.19.21262249), 2021-08-21
Supplement: Supplementary file [file media-1.pdf]

Supplementary Table I. Bivariable associations between vaccine hesitancy and psychological constructs and intention to receive the COVID-19 vaccine among women and gender diverse individuals in British Columbia, Canada (n=5,588)

|                                                                  | Crude OR | 95% CI      | P-value |
|------------------------------------------------------------------|----------|-------------|---------|
| WHO Lack of Vaccine Confidence Scale                             | 0.32     | 0.28 – 0.36 | <0.001  |
| WHO Vaccine Risks Scale                                          | 0.52     | 0.48 – 0.56 | <0.001  |
| Attitudes toward the COVID-19 Vaccine Scale                      | 1.16     | 1.14 – 1.18 | <0.001  |
| Perceived Behavioural Control Scale                              | 1.07     | 1.05 – 1.10 | <0.001  |
| Direct Social Norms Scale                                        | 1.27     | 1.25 – 1.30 | <0.001  |
| Indirect Social Norms: Total Scale                               | 1.10     | 1.09 – 1.11 | <0.001  |
| Indirect Social Norms: Family Doctor/Primary Healthcare Provider | 1.28     | 1.25 – 1.31 | <0.001  |
| Indirect Social Norms: BC Provincial Health Officer              | 1.25     | 1.23 – 1.28 | <0.001  |
| Indirect Social Norms: Friends                                   | 1.35     | 1.31 – 1.39 | <0.001  |
| Indirect Social Norms: Family                                    | 1.31     | 1.28 – 1.34 | <0.001  |
